# Spatiotemporal transcriptional dynamics of the cycling mouse oviduct

**Elle C. Roberson<sup>1</sup>, Anna M. Battenhouse<sup>1</sup>, Riddhiman K. Garge<sup>1</sup>, Ngan Kim Tran<sup>1</sup>, Edward M. Marcotte<sup>1</sup>, John B. Wallingford<sup>1,\*</sup>**

<sup>1</sup>Department of Molecular Biosciences, University of Texas at Austin, TX, USA 78712

ORCID: ECR, [orcid.org/0000-0001-7466-7447](https://orcid.org/0000-0001-7466-7447); AMB, [orcid.org/0000-0002-7455-9064](https://orcid.org/0000-0002-7455-9064); RKG, [orcid.org/0000-0002-6774-0172](https://orcid.org/0000-0002-6774-0172); EMM, [orcid.org/0000-0001-8808-180X](https://orcid.org/0000-0001-8808-180X); JBW, [orcid.org/0000-0002-6280-8625](https://orcid.org/0000-0002-6280-8625)

\*Corresponding author information:

[wallingford@austin.utexas.edu](mailto:wallingford@austin.utexas.edu)

Patterson Labs

University of Texas at Austin

2401 Speedway

Austin, TX 78712

## 1 **Abstract**

2 Female fertility in mammals requires iterative remodeling of the entire adult female  
3 reproductive tract across the menstrual/estrous cycle. However, while transcriptome dynamics  
4 across the estrous cycle have been reported in human and bovine models, no global analysis of  
5 gene expression across the estrous cycle has yet been reported for the mouse. Here, we examined  
6 the cellular composition and global transcriptional dynamics of the mouse oviduct along the  
7 anteroposterior axis and across the estrous cycle. We observed robust patterns of differential  
8 gene expression along the anteroposterior axis, but we found surprisingly few changes in gene  
9 expression across the estrous cycle. Notable gene expression differences along the  
10 anteroposterior axis included a surprising enrichment for genes related to embryonic  
11 development, such as Hox and Wnt genes. The relatively stable transcriptional dynamics across  
12 the estrous cycle differ markedly from other mammals, leading us to speculate that this is an  
13 evolutionarily derived state that may reflect the extremely rapid five-day mouse estrous cycle.  
14 This dataset fills a critical gap by providing an important genomic resource for a highly tractable  
15 genetic model of mammalian female reproduction.

## 17 **Introduction**

18 The adult mammalian female reproductive organs – ovary, oviduct, uterus, cervix, and  
19 vagina – hold an interesting position in mammalian physiology because they constantly and  
20 repeatedly engage in a complex remodeling process more commonly associated with  
21 development. With every menstrual or estrous cycle, fluctuations in ovarian steroid hormone  
22 secretion drive remodeling of these tissues, characterized by changes in proliferation, apoptosis,  
23 epithelial morphology, and fluid secretion (Brenner and West, 1975). However, while decades of  
24 research have revealed how these hormones fluctuate across the menstrual/estrous cycle in  
25 multiple mammals, we understand far less about the mechanisms by which these hormones drive  
26 cyclic tissue morphogenesis.

27 The oviducts are most well-known as the conduit between the ovary and uterus, but it is  
28 critical to note they also function as the site of fertilization and pre-implantation embryonic  
29 development (Coy et al., 2012; Coy and Yanagimachi, 2015; Stewart and Behringer, 2012).  
30 Interestingly, the oviducts display robust patterning along the anteroposterior axis, as the two  
31 major epithelial cell types – multiciliated cells (MCCs) and secretory cells – are differentially

32 enriched (Agduhr, 1927; Barton et al., 2020; Stewart and Behringer, 2012). At the anterior  
33 oviduct close to the ovary, MCCs are highly enriched and responsible for capturing the ovulated  
34 oocyte(s), while at the posterior close to the uterus, MCCs are very sparse and act as sperm  
35 reservoirs (Suarez, 2016; Talbot et al., 1999). The reduced proportion of MCCs in the posterior  
36 oviduct reflects the significant increase in the proportion of secretory cells, which are critical to  
37 pre-implantation development (Coy and Yanagimachi, 2015). This anteroposterior pattern of the  
38 mouse oviduct epithelium is known to be established early in postnatal life and requires signaling  
39 from the underlying mesenchyme (Yamanouchi et al., 2010). How this pattern may change  
40 across the estrous cycle is not known.

41 In many species, the cellular basis of morphogenesis of oviduct MCCs across the estrous  
42 cycle was described *via* scanning electron microscopy studies decades ago (Brenner, 1969;  
43 Shirley and Reeder, 1996; Verhage et al., 1973). In Rhesus monkeys, for example, anterior  
44 oviduct epithelial cells are cuboidal at the beginning of the cycle, but then grow in height and  
45 develop cilia at their apical surfaces as estrogen increases (Brenner, 1969). As estrogen decreases  
46 and progesterone increases, the MCCs regress and de-ciliate (Brenner, 1969).

47  
48 In mice, however, such cellular changes have not been thoroughly investigated, although  
49 it was shown that the wet weight of oviducts, as well as RNA and protein concentration,  
50 increases in the first half of the estrous cycle, and then subsequently decreases during the second  
51 half (Bronson and Hamilton, 1971; Yamanouchi et al., 2010). More recently, there is evidence  
52 that ciliary beat frequency changes in response to estrogen and progesterone (Bylander et al.,  
53 2010; Shi et al., 2011). Perhaps surprisingly, while steroid hormone signaling in the oviduct is  
54 crucial for female fertility (Herrera et al., 2020; Winuthayanon et al., 2015), we still lack a  
55 comprehensive view of how cycling steroids impact cellular morphogenesis in the oviduct,  
56 especially in the mouse.

57 A major hurdle to filling this knowledge gap is our very limited understanding of the  
58 transcriptional dynamics that underlie cyclical morphogenesis in this tissue. Transcriptomic  
59 approaches in human, swine, and bovine oviducts have investigated the impact of estrogen and  
60 progesterone, and some studies have also explored anteroposterior patterning in humans and  
61 bovine oviducts (Bauersachs et al., 2004; Cerny et al., 2015; Hess et al., 2013; Kim et al., 2018;  
62 Sowamber et al., 2020). However, the majority of these studies have focused on either the

63 transcriptional response to fertilization and early embryo development or transcriptional  
64 signatures associated with progression of high grade serous ovarian carcinoma in the oviduct.  
65 The absence of a dynamic mouse oviduct transcriptome across the normal estrous cycle  
66 represents a critical gap in our knowledge, especially given its potential utility as a model for  
67 understanding mammalian fertility.

68 Here, we examined both the cellular changes and global transcriptional dynamics along  
69 the length of the oviduct and across the estrous cycle. First, we provide quantitative data on the  
70 density of MCCs along the anteroposterior axis of the oviduct and we show that MCCs do not  
71 remodel across the estrous cycle in mice. In addition, we present 3' RNA-seq (Lohman et al.,  
72 2016) data for the anterior (approximate infundibulum) and posterior (approximate isthmus)  
73 oviduct at each stage of the estrous cycle. While transcript abundances vary strongly along the  
74 anteroposterior axis, our analyses suggest the estrous cycle has a surprisingly limited impact on  
75 transcription. Our data complement previous studies of transcriptional dynamics in the oviduct of  
76 other mammals and provide an important new resource for genetic studies of oviduct function in  
77 the mouse.

78

## 79 **Materials and Methods**

80 **Mice.** 6-8-week-old Swiss Webster female mice were obtained from Charles River and allowed  
81 to acclimate from travel for 1 week. Mice were housed in individually ventilated cages in a  
82 pathogen-free facility with continuous food and water, with a controlled light cycle (light from  
83 7am-7pm). 7-9-week-old females were estrous cycle staged using standard vaginal cytology  
84 (Ajayi and Akhigbe, 2020). Mice were humanely euthanized with extended CO<sub>2</sub> exposure  
85 followed by cervical dislocation, and female reproductive tracts were dissected. All animal  
86 experiments were approved by the University of Texas at Austin Institutional Animal Care and  
87 Use Committee.

88

89 **Tissue processing & immunofluorescence.** Dissected oviducts were carefully linearized (Fig.  
90 1A) by teasing apart the supercoils, gently affixing to a strip of index card to keep the tissue  
91 straight, then fixing in 4% paraformaldehyde for either 4-6hr at room temperature (RT) or  
92 overnight at 4°C. Linearized fixed oviducts were washed in PBS, and then incubated in 30%  
93 sucrose at 4°C overnight. Following a brief incubation in NEG-50 Frozen Section Medium

94 (ThermoFisher), oviducts were embedded in NEG-50 using an ethanol/dry ice bath. 12 $\mu$ m frozen  
95 longitudinal sections were cut on a cryostat (Leica) and dried overnight at RT. Frozen sections  
96 were stored at -20°C.

97 Tissue sections were washed in PBS + 0.1% Tween20 (PBST) three times to remove  
98 NEG-50. Tissues were blocked for at least 30min at RT with 5% normal donkey serum + PBS  
99 (block buffer). Primary antibodies for cilia (mouse anti-acetylated tubulin, 1:1000 dilution,  
100 Sigma, cat# 6-11B-1) were diluted in block buffer and incubated on slides for 2hr at RT or  
101 overnight at 4°C. After washing three times with PBST, slides were incubated with Alexa-Fluor  
102 coupled secondary antibodies (goat anti-mouse 647, 1:1000 dilution, ThermoFisher) and DAPI  
103 (1:1000 dilution, ThermoFisher) for at least 30min at RT. After washing, slides were mounted  
104 with Prolong Gold (ThermoFisher), and allowed to cure at RT in the dark overnight. Oviduct  
105 sections were imaged on either a Zeiss LSM700 point scanning confocal microscope or a CSU-  
106 W1 spinning disk Nikon confocal.

107

108 ***Tissue sectioning and quantitation.*** Two to four sections spaced at least 100 $\mu$ m apart were  
109 analyzed for cilia at four locations along the anteroposterior axis of the oviduct. Images from the  
110 the fimbria, anterior third (approximate infundibulum), middle third (approximate ampulla), and  
111 posterior third (approximate isthmus) were acquired and quantified. We quantified ciliary area as  
112 previously published (Roberson et al., 2020). Briefly, we used FIJI image processing to trace the  
113 lumen based on DAPI staining to approximate the luminal length. Similarly, the ciliated surface  
114 of the lumen was traced and measured based on acetylated tubulin staining. From these  
115 measurements, the % ciliated surface area was calculated for each image, and we plotted using  
116 GraphPad Prism 8.

117

118 ***RNA isolation and cDNA synthesis.*** For 3' TagSeq (see below), dissected oviduct samples were  
119 collected in duplicate for each of the four stages across both anterior and posterior regions. For  
120 qPCR, samples were collected in triplicate for each estrous cycle stage across anterior, middle,  
121 and posterior thirds of the mouse oviduct. Following storage in RNALater Storage Solution  
122 (Sigma, cat#: R0901) at -20°C, oviduct tissue was manually disrupted and the lysate was spun  
123 through a QIAshredder column (Qiagen, cat#: 79656) to fully homogenize. A Qiagen RNeasy  
124 mini kit (Qiagen, cat#: 74106) was used to harvest RNA for RNAseq, and the Qiagen RNeasy

125 micro kit (Qiagen, cat#: 74004) was used to harvest RNA for qPCR. Total RNA was then either  
126 provided to the Genomic Sequencing and Analysis Facility at the University of Texas at Austin  
127 for 3' TagSeq, or cDNA was synthesized using the iScript Reverse Transcription SuperMix  
128 (BioRad, cat#: 1708841) for qPCR.

129  
130 **qPCR.** Most primers were designed from a database for mouse and human qPCR primers  
131 incorporated into the UCSC genome browser (Zeisel et al., 2013). Primers for *Foxj1* and *Msx2*  
132 were designed using Primer3Plus software. See Supplemental Table S-1 for primer details. We  
133 confirmed specificity of primers by ensuring that they BLAST to no more than 1 site in the  
134 genome. There were four outliers to this BLAST assessment: all four ribosome primer sets  
135 blasted to more than 1 site in the genome, likely because there are numerous ribosomal  
136 pseudogenes scattered throughout the genome (Sisu et al., 2020). In addition, we only used  
137 primers whose melting curve displayed a single peak.

138 Primer sets were diluted from a stock (100 $\mu$ M in TE buffer) to 1 $\mu$ M in distilled deionized  
139 H<sub>2</sub>O. 2 $\mu$ L of each primer set (in technical duplicates) was allowed to dry in the bottom of a well  
140 in a MicroAmp Fast Optical 96 Well Reaction Plate (ThermoFisher, cat#: 43-469-06). 10 $\mu$ L of a  
141 master mix of cDNA (250pg/well), Applied Biosystems SYBR Select Master Mix  
142 (ThermoFisher, cat#: 44-729-18), and distilled deionized water was added to each well, the plates  
143 were sealed with MicroAmp Optical Adhesive Film (ThermoFisher, cat#: 43-119-71) and  
144 allowed to incubate at RT in the dark for at least 15min to rehydrate primer. Plates were run on a  
145 ViiA-7 Real-Time PCR system (ThermoFisher), and CT values were auto-determined by the  
146 ViiA-7 software. The standard  $2^{-\Delta\Delta C_t}$  method was then used to determine fold change based on  
147 the geomean of three 'housekeeping' genes (*Hprt*, *Dolk*, and *Sra1*) (Schmittgen and Livak,  
148 2008).

149  
150 **TagSeq.** Tissue samples were collected in duplicate for each of the four estrous stages across  
151 both anterior and posterior regions of the mice oviduct, accounting for 16 samples in total.  
152 Library preparation and sequencing for TagSeq (Lohman et al., 2016; Meyer et al., 2011), a form  
153 of 3' RNA sequencing, were performed by the Genomic Sequencing and Analysis Facility  
154 (GSAF) at The University of Texas at Austin. Total RNA was isolated from each sample by  
155 addition of Trizol (Thermo Fisher) and the sample was transferred to a Phasemaker tube

156 (Thermo Fisher). Total RNA was extracted following the protocol supplied by the manufacturer  
157 and further cleaned up using a RNeasy MinElute Cleanup Kit (Qiagen). RNA integrity number  
158 (RIN) was measured using an Agilent Bioanalyzer and 100 ng of RNA was used for the TagSeq  
159 protocol. The fragmentation/RT mix was prepared and added to each RNA sample, then heated  
160 to 95°C for 2.5 minutes on a Thermocycler and immediately put on ice for 2 minutes. After  
161 cooling and addition of the template switching oligo and SmartScribe RT, the fragmented RNA  
162 reaction was incubated at 42°C for 1hr, 65°C for 15 min. Next an AmPure bead clean-up was  
163 completed for the cDNA before it was amplified to incorporate the Illumina sequencing primer  
164 site, followed by another cleanup. The remaining portions of the Illumina adapter (the i5 and i7  
165 indices) were then added through an additional 4 cycles of PCR. Final libraries were quantified  
166 with PicoGreen then pooled equally for size selection using the Blue Pippin from 355-550 bp.  
167 Resulting libraries were sequenced using an Illumina HiSeq 2500 instrument (50-nt single  
168 reads). Full sample dataset details are provided in Supplemental Table S-2.

169

170 ***Sequence data pre-processing.*** Fastq datasets were initially processed to collapse duplicates  
171 based on TagSeq molecular barcodes (Matz). Sequencing data quality, both before and after  
172 TagSeq pre-processing, was evaluated using the FastQC tool (v0.11.9) (Andrews) and reports  
173 were aggregated with the MultiQC program (v1.0) (Ewels et al., 2016).

174

175 ***TagSeq data analysis.*** Single-end pseudo-alignment was performed against the mouse  
176 transcriptome (GENCODE M23 transcript sequences (Frankish et al., 2019)) using kallisto  
177 (v0.45.0) (Bray et al., 2016) with options -l 200 -s 50 --single-overhang -bias. Downstream  
178 analysis of transcript abundance data was performed in R (v3.4.4) following protocols outlined  
179 in Bioconductor (Gentleman et al., 2004). The tximport package (v1.6.0) (Soneson et al., 2015)  
180 was first used to roll up transcript-level counts into gene-level counts provided to  
181 the DESeq2 package (v1.18.1) (Love et al., 2014). Before further analysis, count data matrices  
182 were filtered to remove genes with fewer than 1 read across all included samples. A number of  
183 models were analyzed to explore the oviduct location/estrous stage relationship: Posterior versus  
184 Anterior locations, first providing Early and Late data separately (n=8 each), then again  
185 providing all datasets (n=16); and Late versus Early, first providing Anterior and Posterior  
186 location data separately (n=8 each), then again providing all datasets (n=16). Differentially



187 expressed gene results reported are those with maximum adjusted p-value 0.05 and log2 fold  
188 change greater than 1.0 or less than -1.0.

189 Gene ontology (GO) analysis was performed using topGO R package (v2.34.0) (Alexa,  
190 2020) with GO database org.Mm.eg.db (v3.7.0). The topGO classic algorithm and Fisher's exact  
191 test were used in count data mode. Input genes had maximum adjusted p-values of 0.10. Separate  
192 analyses were performed for up-regulated (log2 fold change 0.5 or higher) and down-regulated  
193 (log2 fold change -0.5 or lower) genes. The background gene universe consisted of observed  
194 genes used in the DESeq2 analysis.

195 Full DESeq2 and topGO results are provided in the supplementary zip file for GEO accession  
196 number GSE164718.

197

## 198 **Results and Discussion**

### 199 ***Quantification of multiciliated cell density in the cycling mouse oviduct.***

200 Oviducts in most mammals consist of two key epithelial cell types – secretory and  
201 multiciliated cells (MCCs) – and these are unevenly distributed across the anteroposterior axis.  
202 MCCs are enriched anteriorly and secretory cells, posteriorly (Agduhr, 1927; Yamanouchi et al.,  
203 2010). While dynamic morphology changes across the estrous cycle have been described in the  
204 oviducts of many mammals (Brenner, 1969; Ferenczy et al., 1972; Novak and Everett, 1928;  
205 Shirley and Reeder, 1996; Verhage et al., 1973), the issue has not been investigated thoroughly  
206 in the mouse. To stringently assess cellular remodeling of the anteroposterior axis of the mouse  
207 oviduct across the estrous cycle, we linearized the normally supercoiled oviduct by carefully  
208 teasing apart each coil along the length of the organ (Fig. 1A), and generated longitudinal  
209 sections of linearized tissue. We then performed immunostaining for acetylated tubulin (Tub<sup>Ac</sup>)  
210 to label MCC cilia, and DAPI to label nuclei (Fig. 1B-E).

211 By examining fimbria, anterior (approximate infundibulum), middle (approximate  
212 ampulla), and posterior (approximate isthmus) regions of the oviduct, we clearly observed the  
213 anterior bias in MCC density (Fig. 1B-E). We quantified this pattern by calculating the  
214 percentage of cilia that line the oviduct lumen, based on Tub<sup>Ac</sup> staining as described previously  
215 (Roberson et al., 2020) (Fig. 1F).

216 By performing parallel analyses on linearized oviducts from each stage of the estrous  
217 cycle, we found that this pattern displayed no temporal changes, with the anterior oviduct being



218 significantly enriched for MCCs at all stages (Fig. 1F). The absence of significant remodeling of  
219 MCCs across the estrous cycle in the mouse oviduct presents a marked contrast to other  
220 mammals (Brenner, 1969; Shirley and Reeder, 1996; Verhage et al., 1973). We hypothesize that  
221 this discrepancy may relate to the very short (4 to 5 day) mouse estrous cycle (Ajayi and  
222 Akhigbe, 2020) and time required to eliminate and re-establish ciliated cells.

223

### 224 ***Determining spatiotemporal transcriptome dynamics in the mouse oviduct.***

225 Patterns of secretion, and bulk RNA and protein concentrations are known to change  
226 during the mouse estrous cycle (Bronson and Hamilton, 1971). To ask if such changes have a  
227 transcriptional basis, we performed 3' TagSeq, a high-throughput RNAseq profiling method that  
228 captures and sequences the 3' ends of mRNA transcripts, enabling efficient estimation of relative  
229 gene expression (Lohman et al., 2016; Meyer et al., 2011). We performed two biological  
230 replicates of 3' TagSeq on isolated anterior (highly ciliated) and posterior (minimally ciliated)  
231 oviducts at each stage of the estrous cycle (Fig. 2A). Principal component analysis (PCA)  
232 revealed that the majority of expression differences occur along the AP axis (72% of variance),  
233 while the estrous cycle accounts for much less variance (13%) (Fig. 2B).

234 The lack of strong variation across the estrous cycle was striking, so we considered that  
235 our data might be underpowered to detect statistically significant trends across time (n=2 per  
236 estrous cycle stage). We therefore repeated our analyses, collapsing the estrous cycle stages into  
237 'Early' (proestrus and estrus) and 'Late' (metestrus and diestrus). This approach improved  
238 differentiation between the major cycle phases; the majority of differentially expressed genes  
239 (DEGs) were still found along the AP axis, not across the estrous cycle. For example, of the  
240 1,758 DEGs enriched in the anterior oviduct, over 65% of them (1,158) were shared between  
241 Early and Late phases (Fig. 2C). Similarly, of the 1,203 DEGs enriched in the posterior, 45%  
242 (542) were shared between Early and Late (Fig 2D).

243 A more granular view of these data using volcano plots illustrates this finding. In the  
244 anterior oviduct, we identified only 27 early and 14 late DEGs (Fig. 2E). Similarly, modest  
245 enrichments were identified in the posterior, with 54 early and 40 late DEGs (Fig. 2F). The  
246 magnitude of the expression changes was also modest, with the majority of DEG effect sizes  
247 (absolute value of the log<sub>2</sub> fold change) of two or less (59% of estrous cycle DEGs, vs. 44% of  
248 AP DEGs). This result contrasts starkly to the transcriptional dynamics in the oviducts of other

249 organisms, including human, bovine, and swine, across the menstrual/estrous cycle (Bauersachs  
250 et al., 2004; Cerny et al., 2015; Hess et al., 2013; Kim et al., 2018). For example, in bovine  
251 anterior oviducts, 972 genes have been reported as enriched early and 597 enriched late (Cerny et  
252 al., 2015), while in human anterior oviducts, 650 genes have been reported as enriched early and  
253 683 enriched late (Hess et al., 2013).

254 In contrast to the muted transcriptional dynamics across the estrous cycle, we observed  
255 highly robust and spatially-restricted patterns of gene expression along the AP axis of the mouse  
256 oviduct. We identified 1337 genes enriched in the anterior, and 770 in the posterior early in the  
257 estrous cycle (Fig. 2G). Similarly, late in the estrous cycle, 1579 genes were enriched in the  
258 anterior and 975 in the posterior (Fig. 2H). Thus, our data suggest that the mouse oviduct  
259 experiences relatively modest transcriptional changes as it progresses through the estrous cycle,  
260 but displays robust transcriptional differences along the AP axis.

261

262 ***The mouse oviduct transcriptome is relatively stable across the estrous cycle.***

263 While our finding of modest transcriptional variation across the estrous cycle in the  
264 mouse oviduct was consistent with the general lack of robust tissue remodeling, it was still  
265 surprising given the impact of cycling steroid hormones on oviduct function (Barton et al.,  
266 2020). To ask if the small number of DEGs we observed across time were enriched in particular  
267 classes, we performed Gene Ontology (GO) analysis (Alexa, 2020) on the early versus late  
268 DEGs. In the late stages, DEGs were subtly enriched for xenobiotic metabolism: xenobiotic  
269 metabolic process, cellular response to xenobiotic stimulus, and xenobiotic catabolic process  
270 (Supp. Fig. 1B).

271 More interestingly, DEGs in the early stages were enriched for translation-related terms:  
272 peptide metabolic process, peptide biosynthetic process, translation, gene expression, and  
273 cellular amide metabolic process (Supp. Fig. 1A). This enrichment for translation-related terms  
274 early in the estrous cycle is consistent with the known concomitant increase in protein  
275 concentration (Bronson and Hamilton, 1971). In agreement with the GO analysis, manual  
276 annotation revealed an enrichment of large and small ribosome subunit genes expressed in the  
277 early estrous cycle compared to late (Fig. 3A), with these genes displaying a 2 to 4-fold change  
278 in abundance (Fig. 3B).

279 Further curation identified potentially interesting candidates based on their known or  
280 hypothesized function in female fertility. For example, *Mki67*, *Ddit4*, *Atp1a1*, *Slc7a11*, *Mmp11*,  
281 *Mmp7*, *Spock1*, and *Wsb1* were each enriched at early stages, while *Mamdc4*, *Gstp2*, *Gsta3*,  
282 *Susd2*, and *Ap1g2* were enriched late, either in the anterior, posterior, or both (Fig. 3C). Among  
283 these, *Mmp7* and *Slc7a11* were especially interesting, because both were upregulated early and  
284 down regulated late, a pattern that is consistent with that observed in the cycling human oviduct  
285 (Hess et al., 2013). *Mmp7* is part of the matrix-degrading enzyme family, and its down-  
286 regulation late in the human menstrual cycle is hypothesized to help maintain oviduct matrix  
287 integrity as the pre-implantation embryo travels through the organ (Hess et al., 2013). *Slc7a11* is  
288 a glutamate/cysteine antiporter that is similarly regulated in the bovine oviduct (Cerny et al.,  
289 2015). The majority of these DEGs also displayed modest effect sizes, similar to the ribosomal  
290 genes (Fig. 3D).

291 To independently verify the observed stability of the oviduct transcriptome across the  
292 estrous cycle, we performed qPCR for several of the DEGs. Consistent with the transcriptome-  
293 wide data, we did not observe statistically significant changes across the estrous cycle for most  
294 genes assayed (Fig. 3E-K), but the trends in expression consistently reflected trends in our  
295 TagSeq data. The robust differential expression observed by qPCR between anterior and  
296 posterior (see next section) indicate that these negative findings across the cycle do not reflect a  
297 lack of sensitivity in our assays. Rather, we conclude that the relatively modest remodeling  
298 observed in the oviduct by histology (Fig. 1) is reflected by relatively muted transcriptional  
299 dynamics across the estrous cycle. While future work will be required, it seems reasonable to  
300 suggest that the stability of the mouse oviduct across the estrous cycle represents an  
301 evolutionarily derived state associated with the extremely rapid mouse estrous cycle, which at  
302 four to five days, is much faster than in other organisms (Brenner and West, 1975).

303

### 304 ***The mouse oviduct displays robust transcriptional patterning along the anteroposterior axis.***

305 We next sought to understand the robust changes in gene expression we observe along  
306 AP axis of the oviduct. We therefore turned again to GO Term analysis (Alexa, 2020).  
307 Consistent with the strong anterior enrichment of MCCs observed by histology (Fig. 1), anterior-  
308 enriched DEGs were highly enriched for cilia-related processes (Supp. Fig. 1C). In the anterior,  
309 complexes that function in MCCs, including intraflagellar transport, transition zone, CPLANE,

310 and BBSome proteins (Garcia et al., 2018), as well as ciliary motility (Legendre et al., 2020) and  
311 MCC transcription factors (Lewis and Stracker, 2020) were enriched (Fig. 4A). To provide  
312 additional resolution to these patterns of expression for MCC-specific genes, we performed  
313 qPCR for several at each estrous cycle stage, using not just anterior and posterior regions but  
314 also the intervening middle region of the oviduct. We observed robust, statistically significant  
315 enrichment in the anterior region for a ciliary transcription factor (*Foxj1*), a transition zone  
316 complex gene (*Tmem231*), two ciliogenesis genes (*Ift140* and *Ift57*), and one gene encoding a  
317 component of the ciliary beating machinery (*Dnah9*) (Fig. 4F-I).

318 To investigate whether mouse anterior oviduct DEGs are similar to human multiciliated  
319 tissues, we compared our MCC-enriched dataset to the recently published human multiciliated  
320 tissue transcriptional signature (Patir et al., 2020). The analysis of four human multiciliated  
321 tissues, including ependymal, oviduct, trachea, and sperm, identified 248 genes expressed by all  
322 four tissues. Of those, we find 166 of them to be differentially expressed in the anterior of the  
323 mouse oviduct (data not shown), suggesting that, transcriptionally, multiciliated genes of the  
324 mouse oviduct are highly similar to those of human multiciliated tissues.

325 Non-ciliated epithelial cells in the posterior oviduct consist predominantly of secretory  
326 cells (Agduhr, 1927; Ghosh et al., 2017). Accordingly, our posterior-enriched gene set was  
327 strongly enriched for transport and secretion GO Terms (Supp. Fig. 4), including solute carriers,  
328 transport ATPases, Ca<sup>2+</sup> and K<sup>+</sup> channels (Fig. 4A). These GO terms are similar to previously  
329 published datasets from other mammals, including cows and humans, where vesicle-mediated  
330 transport, endocytosis, and exocytosis were among the main processes enriched in the posterior  
331 (Gonella-Diaza et al., 2017; Maillo et al., 2016; Rose et al., 2020). We confirmed this trend using  
332 qPCR for a transport ATPase (*Atp1b1*) and a solute carrier (*Slc39a8*); both were significantly  
333 enriched in the posterior (Fig. 4K, L).

334 Interestingly, certain genes enriched in the mouse oviduct posterior are differentially  
335 expressed across the human menstrual cycle (Hess et al., 2013). For example, of the 33 solute  
336 carrier (Slc) genes that are enriched in the posterior of the mouse oviduct, eight of them are also  
337 differentially expressed across the human menstrual cycle, including *Slc2a3*, *Slc22a23*, *Slc27a3*,  
338 *Slc39a14*, *Slc39a2*, *Slc39a8*, *Slc4A7*, *Slc8a1* (Hess et al., 2013). These Slc genes are  
339 hypothesized to be important for secreting amino acids and other nutrients into the oviductal  
340 lumen to aid in preimplantation embryonic development. Further studies investigating SLC

341 expression dynamics across both humans and mice may offer insights into the evolution of  
342 mammalian reproduction and divergence underlying these secretory cell types.

343

344 ***Patterned expression of known developmental signaling systems along the anteroposterior***  
345 ***axis of the adult oviduct.***

346 Our analysis of anteroposterior gene expression patterns also revealed several previously  
347 unreported trends. First, the genes up-regulated specifically in the posterior oviduct were  
348 strongly enriched for GO Terms related to embryonic development (Supp. Fig. 1D). For  
349 example, all three non-canonical Wnt ligands, *Wnt5a*, *Wnt7a*, and *Wnt11* were enriched in the  
350 posterior region of the oviduct (Fig. 4B, N, O). Moreover, two antagonists of canonical Wnt  
351 signaling were also differentially expressed, but in a curious fashion: *Dkk2* was enriched in the  
352 posterior, while *Dkk3* was enriched in the anterior (Fig. 4B). Components of the FGF signaling  
353 pathway were also differentially expressed: *Fgf1*, *Fgf16*, and *Fgf2* were enriched in the posterior,  
354 while only the FGF receptor, *Fgfr3*, was enriched in the anterior (Fig. 4C). Finally, multiple  
355 transcription factors were differentially expressed, including *Msx2* (Fig. 4M) and several Hox  
356 genes, including *Hoxa9* and *Hoxa10* (Fig. 4D), both of which are involved in female  
357 reproductive tract development (Du and Taylor, 2015). Other differentially expressed Hox genes  
358 include *Hoxb2*, *Hoxb7*, *Hoxb8*, and *Hoxc10* (Fig. 4D). We confirmed the differential expression  
359 of many of the developmental regulators using qPCR (Fig. 4M-O)

360 Not all signaling pathways displayed patterned expression, and an excellent example is  
361 the Planar Cell Polarity (PCP) pathway (Fig. 4E). The PCP system is essential for normal  
362 polarized ciliary beating in the oviduct, so most PCP genes are expressed in the oviduct (Koyama  
363 et al., 2019; Shi et al., 2014). Strikingly however, none displayed enrichment along the AP axis  
364 (Fig. 4E).

365 In contrast to intracellular effectors of PCP signaling, expression of non-canonical Wnt  
366 ligands was strongly polarized, which was of interest for multiple reasons. First, Wnt signaling is  
367 necessary to maintain stemness in human oviduct organoid cultures (Kessler et al., 2015), and  
368 secretory cells are thought to be the progenitors of MCCs in the mouse oviduct. Thus, it may be  
369 that posteriorly enriched Wnt signaling maintains the progenitor capabilities of posteriorly  
370 enriched secretory cells (Ghosh et al., 2017). Second, *Wnt5a/7a/11* are known to orient PCP  
371 signaling, providing directional cues for the apical surface of cells and driving coordinated

372 ciliary beating in multiciliated tissues (Butler and Wallingford, 2017; Gao et al., 2011; Koyama  
373 et al., 2019; Ossipova et al., 2015). While the oviduct is planar polarized – i.e. Vangl2 localizes  
374 anteriorly in oviduct epithelial cells – it is unknown where the directional cue originates (Shi et  
375 al., 2016). Our data raise the possibility that posteriorly enriched *Wnt5a/7a/11* orients Vangl2  
376 localization to the anterior side of the oviduct epithelium, thereby regulating ciliary flow towards  
377 the posterior oviduct. Our experiments also indicate that PCP signaling components are evenly  
378 expressed across the AP axis of the oviduct, While the impact of planar polarization on MCCs is  
379 fairly well studied, the corresponding impact on secretory cells remains unknown.

380

### 381 **Conclusions**

382 In summary, our transcriptome profiling data fills a major gap in mouse oviduct investigations.  
383 While confirming reports made using other methods, our detailed anteroposterior axis and  
384 estrous stage analyses reveal novel gene expression patterns as well as providing a foundation for  
385 further studies. Hypotheses generated from these data can inform additional explorations using  
386 orthogonal methods such as single-cell sequencing and proteomics. Such studies have the  
387 potential to identify specific cell types associated with expression trends observed here, as well  
388 as quantifying actual cellular protein abundances which may differ from RNA expression.

389

### 390 **Acknowledgements**

391 We thank the Genome Sequencing and Analysis facility at the University of Texas at Austin for  
392 their support and assistance with sequencing. This research was supported by funding from the  
393 National Institutes of Health (F32HD095618 to E.C.R., R01HL117164 to J.B.W.,  
394 R01HD085901 to J.B.W. and E.M.M., and R35GM122480 to E.M.M.), the American Heart  
395 Association predoctoral fellowship (#18PRE34060258) to R.K.G., and the Welch Foundation (F-  
396 1515, to E.M.M.).

397

398

399

400

401



402 **Figure 1. The mouse oviduct displays anteroposterior patterning that does not change**  
403 **across the estrous cycle.** A) A linearized mouse oviduct, where the anterior is close to the ovary  
404 and the posterior is close to the uterus. The insert shows a non-linearized supercoiled mouse  
405 oviduct (insert, arrow). Oviducts were collected at B) proestrus, C) estrus, D) metestrus, and E)  
406 diestrus, linearized, and imaged for nuclei (DAPI, magenta) and cilia (Tub<sup>Ac</sup>, green) along the  
407 AP axis (fimbria, anterior, middle, and posterior). Scale bar = 100 $\mu$ m. F) Quantitation of the  
408 percent ciliated surface area along the oviduct lumen in each of the four estrous stages. Some  
409 error bars are too small to be seen. \* =  $p < 0.05$ .

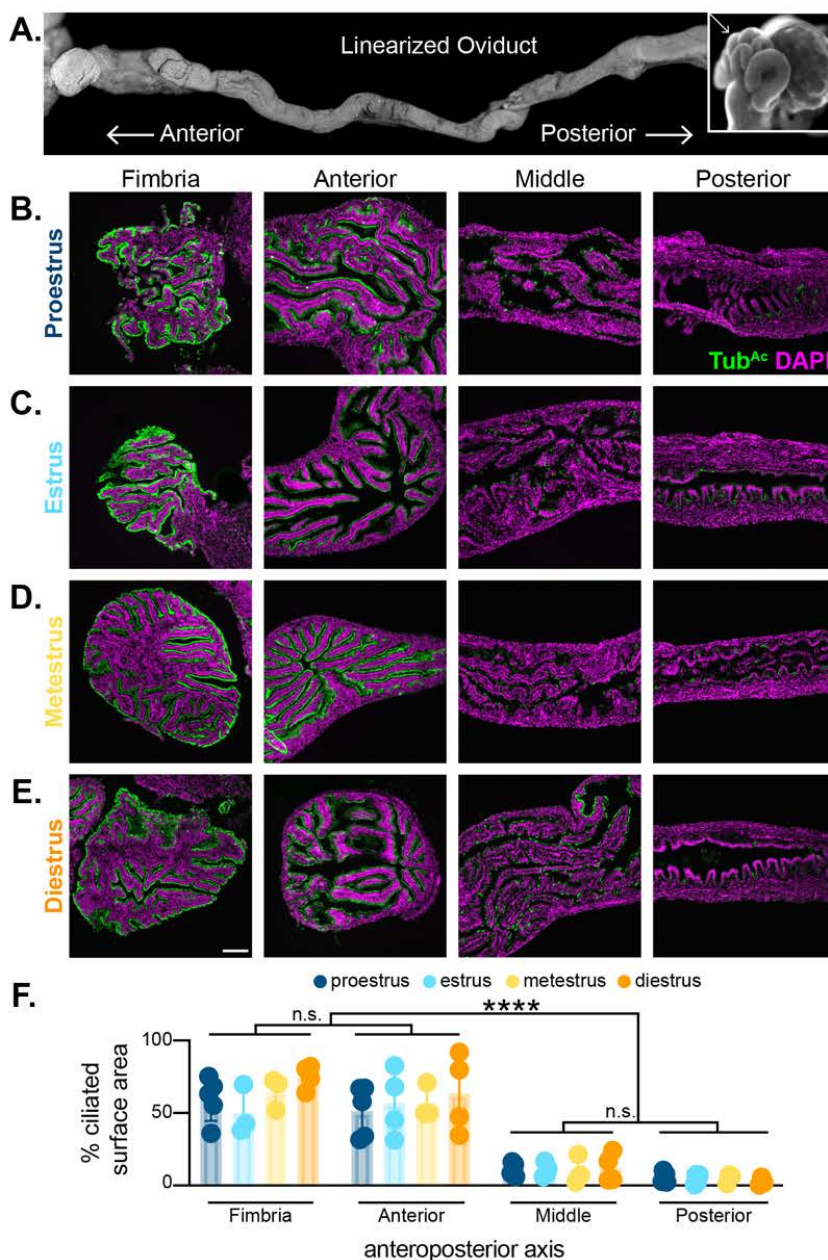



432 **Figure 2. RNAseq of the oviduct shows major differences along the anteroposterior axis**  
 433 **and minor change across the estrous cycle.** A) Oviducts were dissected and linearized from  
 434 each stage of the estrous cycle (n=2 each stage). RNA from the anterior and posterior thirds of  
 435 each oviduct was collected and submitted for 3' TagSeq. B) Principal Component Analysis  
 436 (PCA) of the sixteen 3' TagSeq datasets. AP location (displayed as symbols) accounts for most of  
 437 the variance while estrous cycle stage (displayed as colors) accounts for a lesser part with good  
 438 separation between early (Proestrus, Estrus) and late (Metestrus, Diestrus) phases. C) Overlap  
 439 between the anterior DEGs at early and late estrous cycle phases. D) Overlap between the  
 440 posterior DEGs at early and late phases of the estrous cycle. Volcano plots of oviduct E) anterior  
 441 and F) posterior compare early and late DEGs. Volcano plots of estrous cycle G) early and H)  
 442 late phases cycle show anterior and posterior DEGs. Red points are genes significant at both  
 443 adjusted P-value ( $\leq 0.05$ ) and effect size ( $\log_2$  fold change  $\leq -1$  or  $\geq 1$ ).

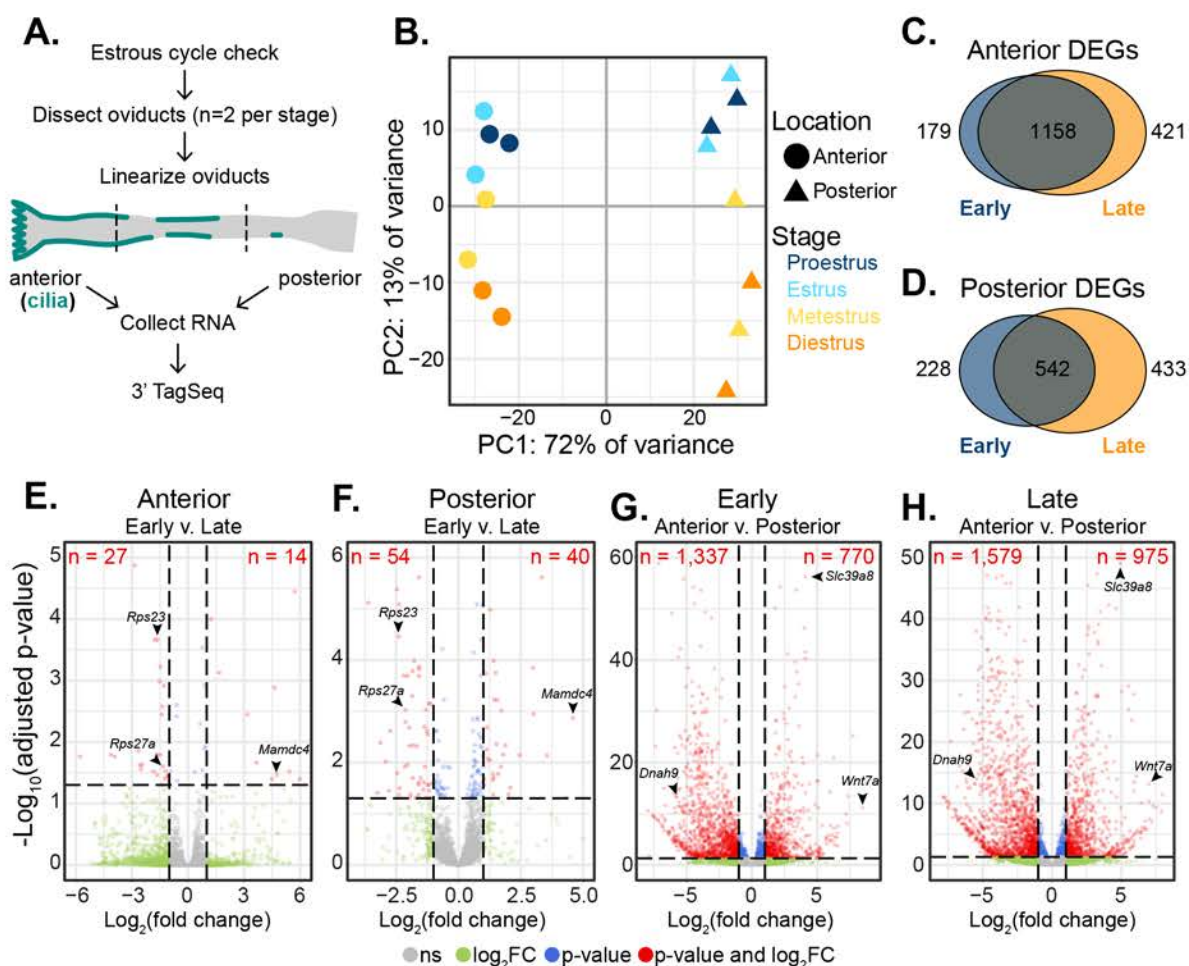

444

445

446 **Figure 3. The mouse oviduct transcriptome is remarkably stable across the estrous cycle.**

447 A) Heatmap depicting expression of ribosomal genes across the estrous cycle where rows  
 448 indicate genes and columns indicate the estrous cycle stage (P- proestrus, E- estrus, M-  
 449 metestrus, D- diestrus). B) The effect size (absolute value of the log<sub>2</sub> fold change) of the  
 450 ribosomal genes was generally modest (under 2). C) Heatmap of other DEGs. D) These genes  
 451 also generally have modest but consistent effect sizes. E-K) qPCR histograms of select genes  
 452 from B and D along the anteroposterior axis at each estrous cycle stage. All heatmap scales use  
 453 DESeq2 variance stabilized counts.

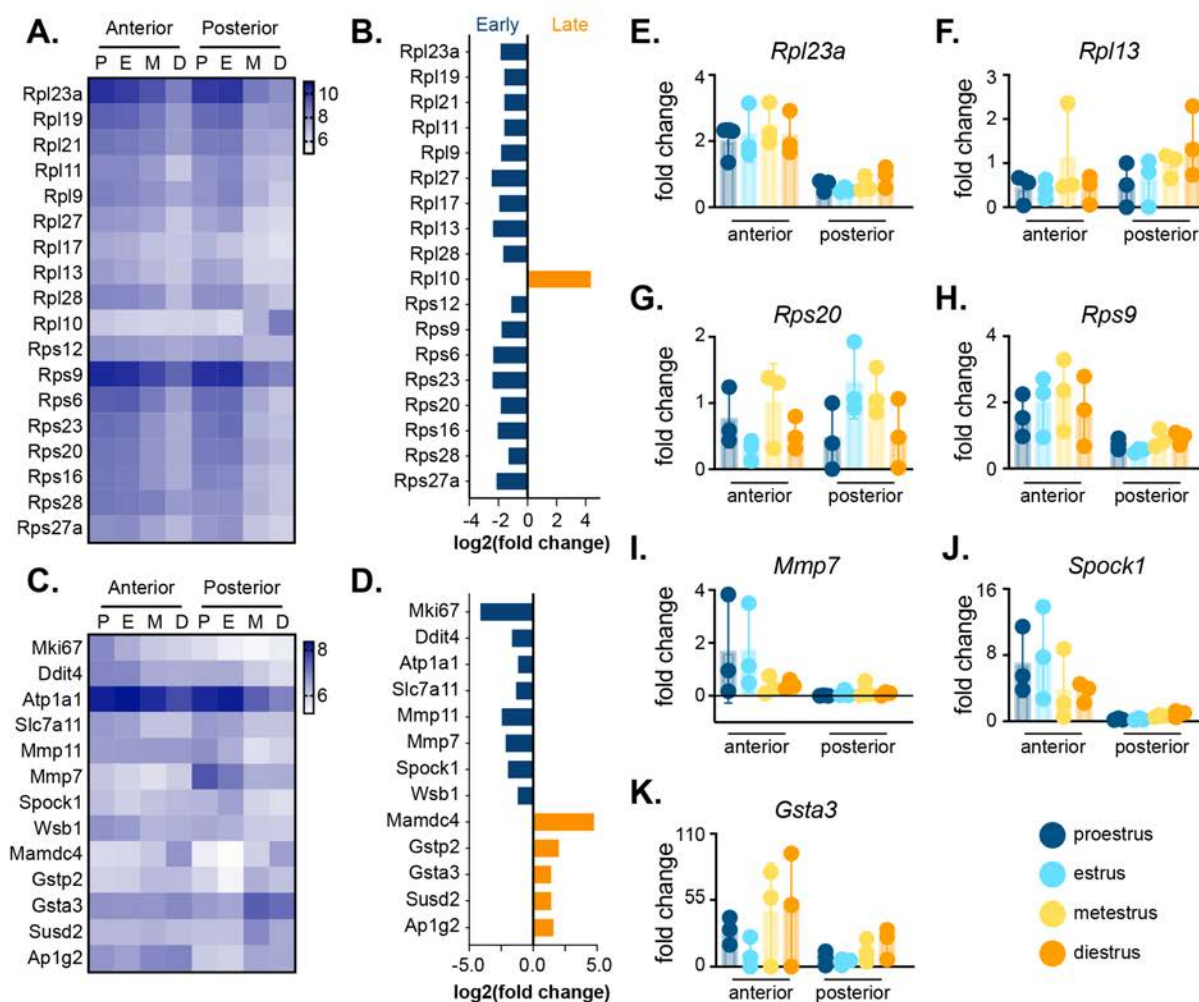

454

455

456

457

458

459 **Figure 4. The mouse oviduct displays robust transcriptional patterning along the**  
 460 **anteroposterior axis.** A) Heatmap showing expression dynamics of DEGs across the anterior  
 461 and posterior, including cilia-related genes and complexes, solute carriers, transport ATPases,  
 462 and calcium and potassium channels. Additional heatmaps of genes in developmental signaling  
 463 pathways, including B) Wnt signaling, C) FGF signaling, D) Hox genes, and E) PCP signaling.  
 464 F-R) qPCR histograms of select genes from A-E along the anteroposterior axis at each estrous  
 465 cycle stage: anterior-enriched genes *Foxj1*, *Tmem231*, *Ift140*, *Ift57*, *Dnah9*; posterior-enriched  
 466 genes *Atp1b1*, *Slc39a8*, *Msx2*, *Wnt7a*, *Wnt5a*; and other qPCR assayed genes *Prickle1*, *Vangl2*,  
 467 *Pax8*.

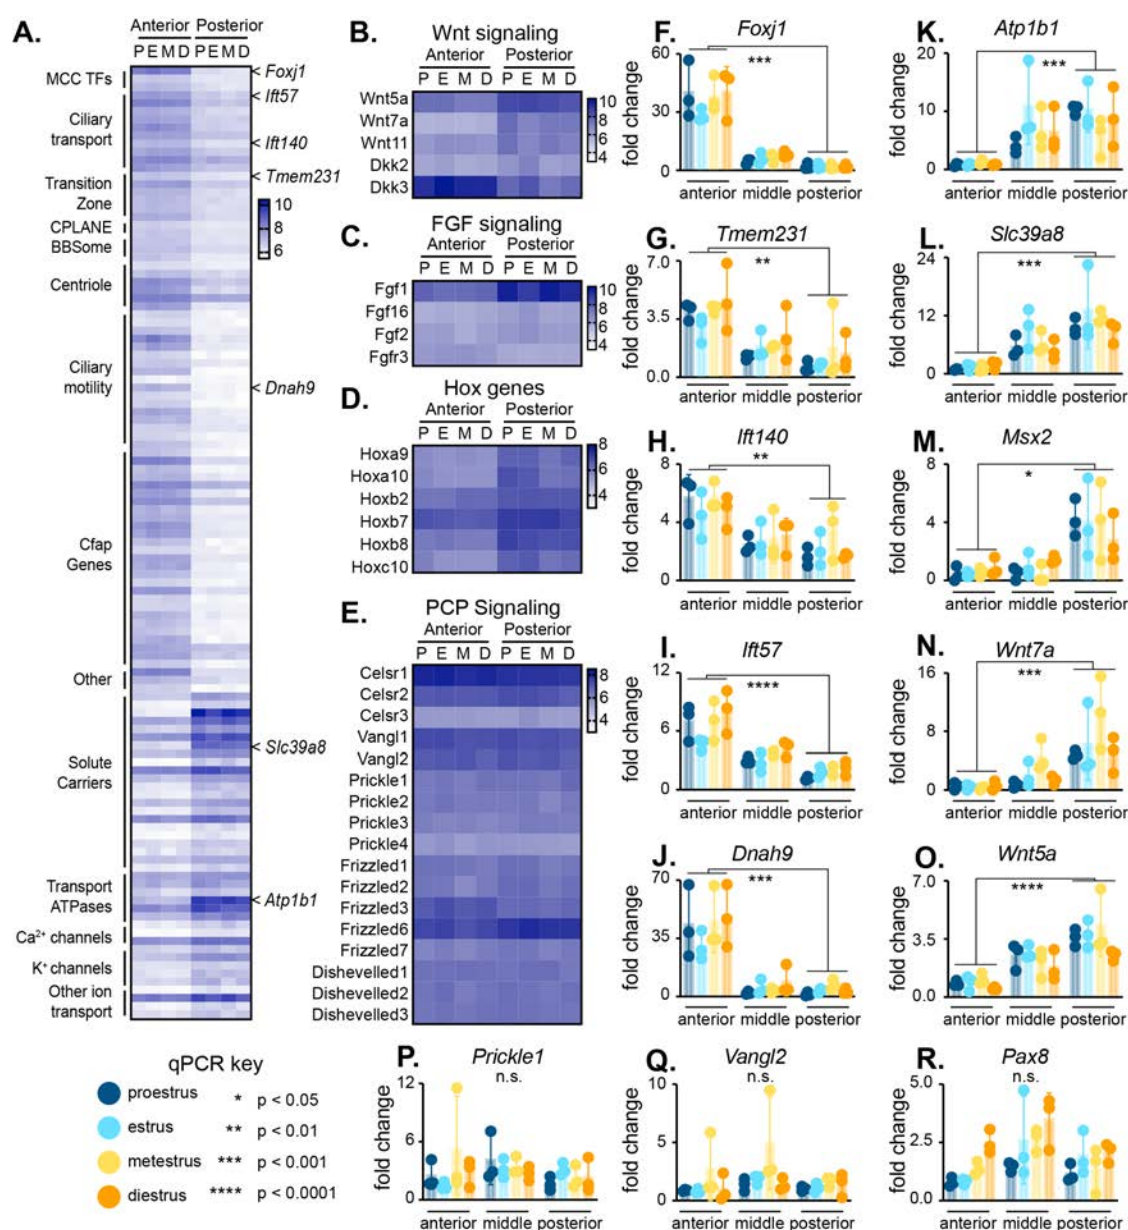



471 **Supplementary Figure 1. Significant GO terms associated with oviduct transcriptome**  
 472 **analysis.** Histograms depicting significant GO terms for A) early, B) late, C) anterior, and D)  
 473 posterior DEGs.

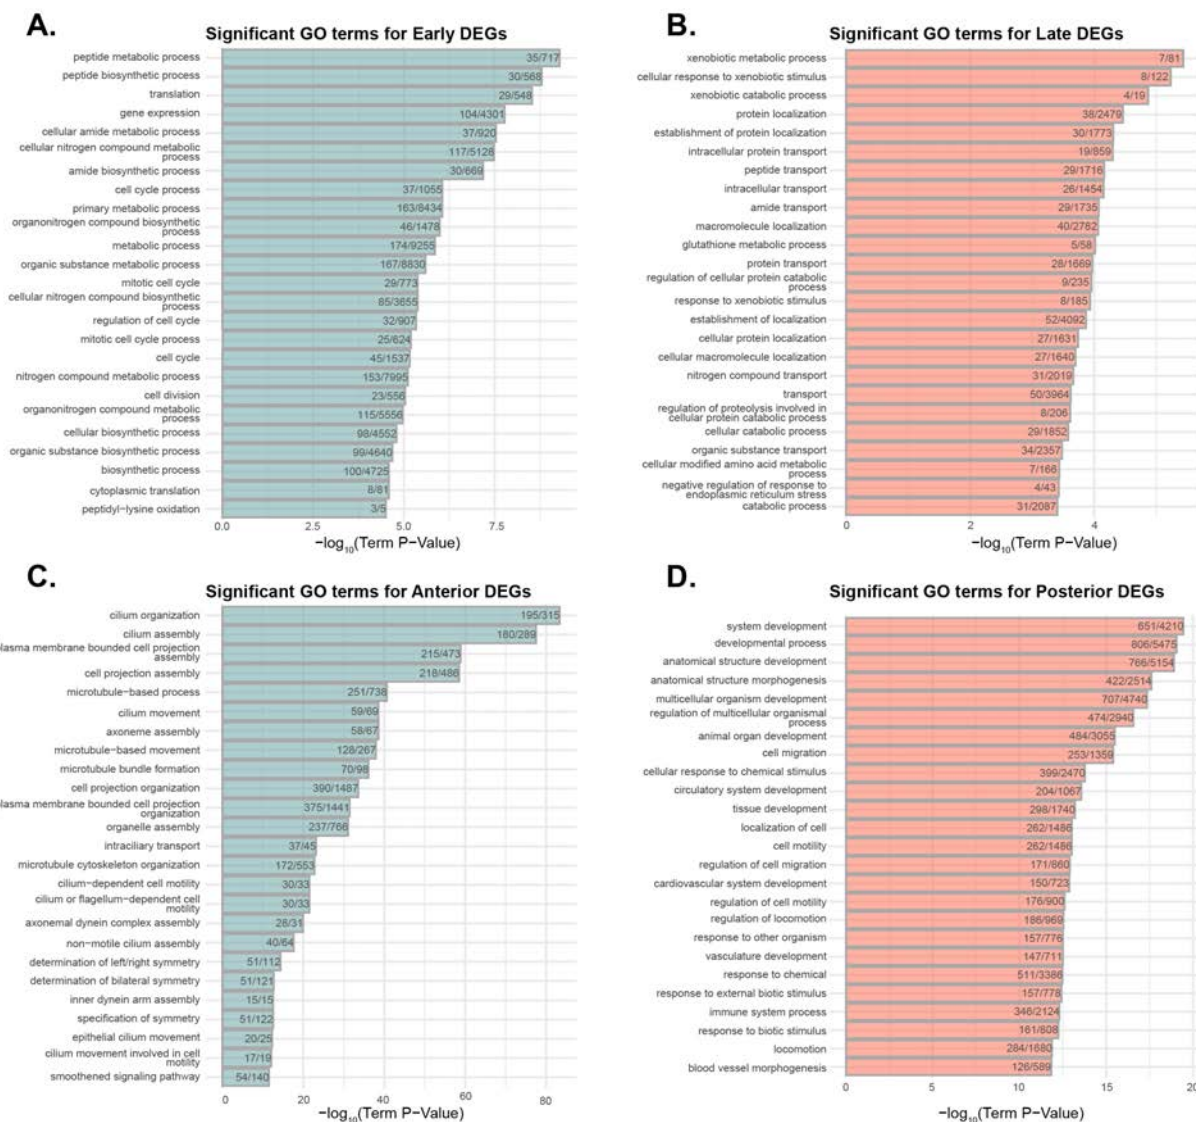

474

475

476 **Supplemental spreadsheet tabs:**

477 **S-1. Primers used for qPCR.**

478 **S-2. Description of the sample datasets used.**

479 Full DEG and GO term details are available in the Supplementary zip file for GEO accession

480 number GSE164718.

481

482 **References**

483 Agduhr, E., 1927. Studies on the structure and development of the bursa ovarica and the tuba  
484 uterina in the Mouse. *Acta Zoologica Stockholm* 8, pp. 1-133.

485 Ajayi, A.F., Akhigbe, R.E., 2020. Staging of the estrous cycle and induction of estrus in  
486 experimental rodents: an update. *Fertil Res Pract* 6, 5.

487 Alexa, A., Rahnenfuhrer, J, 2020. topGO: Enrichment Analysis for Gene Ontology, R package  
488 version 2.40.0.

489 Andrews, S., FastQC. Babraham Bioinformatics, p.  
490 <https://www.bioinformatics.babraham.ac.uk/projects/fastqc/>.

491 Barton, B.E., Herrera, G.G., Anamthathmakula, P., Rock, J.K., Willie, A., Harris, E.A.,  
492 Takemaru, K.I., Winuthayanon, W., 2020. Roles of steroid hormones in oviductal function.  
493 *Reproduction* 159, R125-r137.

494 Bauersachs, S., Rehfeld, S., Ulbrich, S.E., Mallok, S., Prella, K., Wenigerkind, H., Einspanier,  
495 R., Blum, H., Wolf, E., 2004. Monitoring gene expression changes in bovine oviduct epithelial  
496 cells during the oestrous cycle. *J Mol Endocrinol* 32, 449-466.

497 Bray, N.L., Pimentel, H., Melsted, P., Pachter, L., 2016. Near-optimal probabilistic RNA-seq  
498 quantification. *Nat Biotechnol* 34, 525-527.

499 Brenner, R.M., 1969. Renewal of oviduct cilia during the menstrual cycle of the rhesus monkey.  
500 *Fertil Steril* 20, 599-611.

501 Brenner, R.M., West, N.B., 1975. Hormonal regulation of the reproductive tract in female  
502 mammals. *Annu Rev Physiol* 37, 273-302.

503 Bronson, F.H., Hamilton, T.H., 1971. Concentrations of nucleic acids and protein in the mouse  
504 oviduct during the oestrous cycle and after steroid replacement. *J Reprod Fertil* 25, 283-286.

505 Butler, M.T., Wallingford, J.B., 2017. Planar cell polarity in development and disease. *Nat Rev*  
506 *Mol Cell Biol* 18, 375-388.

- 507 Bylander, A., Nutu, M., Wellander, R., Goksör, M., Billig, H., Larsson, D.G., 2010. Rapid  
508 effects of progesterone on ciliary beat frequency in the mouse fallopian tube. *Reprod Biol*  
509 *Endocrinol* 8, 48.
- 510 Cerny, K.L., Garrett, E., Walton, A.J., Anderson, L.H., Bridges, P.J., 2015. A transcriptomal  
511 analysis of bovine oviductal epithelial cells collected during the follicular phase versus the luteal  
512 phase of the estrous cycle. *Reprod Biol Endocrinol* 13, 84.
- 513 Coy, P., Garcia-Vazquez, F.A., Visconti, P.E., Aviles, M., 2012. Roles of the oviduct in  
514 mammalian fertilization. *Reproduction* 144, 649-660.
- 515 Coy, P., Yanagimachi, R., 2015. The Common and Species-Specific Roles of Oviductal Proteins  
516 in Mammalian Fertilization and Embryo Development. *BioScience* 65, 973-984.
- 517 Du, H., Taylor, H.S., 2015. The Role of Hox Genes in Female Reproductive Tract Development,  
518 Adult Function, and Fertility. *Cold Spring Harb Perspect Med* 6, a023002.
- 519 Ewels, P., Magnusson, M., Lundin, S., Kaller, M., 2016. MultiQC: summarize analysis results  
520 for multiple tools and samples in a single report. *Bioinformatics* 32, 3047-3048.
- 521 Ferenczy, A., Richart, R.M., Agate, F.J., Jr., Purkerson, M.L., Dempsey, E.W., 1972. Scanning  
522 electron microscopy of the human fallopian tube. *Science* 175, 783-784.
- 523 Frankish, A., Diekhans, M., Ferreira, A.M., Johnson, R., Jungreis, I., Loveland, J., Mudge, J.M.,  
524 Sisu, C., Wright, J., Armstrong, J., Barnes, I., Berry, A., Bignell, A., Carbonell Sala, S., Chrast,  
525 J., Cunningham, F., Di Domenico, T., Donaldson, S., Fiddes, I.T., Garcia Giron, C., Gonzalez,  
526 J.M., Grego, T., Hardy, M., Hourlier, T., Hunt, T., Izuogu, O.G., Lagarde, J., Martin, F.J.,  
527 Martinez, L., Mohanan, S., Muir, P., Navarro, F.C.P., Parker, A., Pei, B., Pozo, F., Ruffier, M.,  
528 Schmitt, B.M., Stapleton, E., Suner, M.M., Sycheva, I., Uszczynska-Ratajczak, B., Xu, J., Yates,  
529 A., Zerbino, D., Zhang, Y., Aken, B., Choudhary, J.S., Gerstein, M., Guigo, R., Hubbard, T.J.P.,  
530 Kellis, M., Paten, B., Reymond, A., Tress, M.L., Flicek, P., 2019. GENCODE reference  
531 annotation for the human and mouse genomes. *Nucleic Acids Res* 47, D766-D773.
- 532 Gao, B., Song, H., Bishop, K., Elliot, G., Garrett, L., English, M.A., Andre, P., Robinson, J.,  
533 Sood, R., Minami, Y., Economides, A.N., Yang, Y., 2011. Wnt signaling gradients establish

- 534 planar cell polarity by inducing Vangl2 phosphorylation through Ror2. *Developmental cell* 20,  
535 163-176.
- 536 Garcia, G., 3rd, Raleigh, D.R., Reiter, J.F., 2018. How the Ciliary Membrane Is Organized  
537 Inside-Out to Communicate Outside-In. *Curr Biol* 28, R421-R434.
- 538 Gentleman, R.C., Carey, V.J., Bates, D.M., Bolstad, B., Dettling, M., Dudoit, S., Ellis, B.,  
539 Gautier, L., Ge, Y., Gentry, J., Hornik, K., Hothorn, T., Huber, W., Iacus, S., Irizarry, R., Leisch,  
540 F., Li, C., Maechler, M., Rossini, A.J., Sawitzki, G., Smith, C., Smyth, G., Tierney, L., Yang,  
541 J.Y., Zhang, J., 2004. Bioconductor: open software development for computational biology and  
542 bioinformatics. *Genome Biol* 5, R80.
- 543 Ghosh, A., Syed, S.M., Tanwar, P.S., 2017. In vivo genetic cell lineage tracing reveals that  
544 oviductal secretory cells self-renew and give rise to ciliated cells. *Development (Cambridge,*  
545 *England)* 144, 3031-3041.
- 546 Gonella-Diaza, A.M., da Silva Andrade, S.C., Sponchiado, M., Pugliesi, G., Mesquita, F.S., Van  
547 Hoeck, V., de Francisco Strefezzi, R., Gasparin, G.R., Coutinho, L.L., Binelli, M., 2017.  
548 Oviductal transcriptional profiling of a bovine fertility model by next-generation sequencing.  
549 *Genom Data* 13, 27-29.
- 550 Herrera, G.G.B., Lierz, S.L., Harris, E.A., Donoghue, L.J., Hewitt, S.C., Rodriguez, K.F.,  
551 Jefferson, W.N., Lydon, J.P., DeMayo, F.J., Williams, C.J., Korach, K.S., Winuthayanon, W.,  
552 2020. Oviductal Retention of Embryos in Female Mice Lacking Estrogen Receptor  $\alpha$  in the  
553 Isthmus and the Uterus. *Endocrinology* 161.
- 554 Hess, A.P., Talbi, S., Hamilton, A.E., Baston-Buest, D.M., Nyegaard, M., Irwin, J.C., Barragan,  
555 F., Kruessel, J.S., Germeyer, A., Giudice, L.C., 2013. The human oviduct transcriptome reveals  
556 an anti-inflammatory, anti-angiogenic, secretory and matrix-stable environment during embryo  
557 transit. *Reprod Biomed Online* 27, 423-435.
- 558 Kessler, M., Hoffmann, K., Brinkmann, V., Thieck, O., Jackisch, S., Toelle, B., Berger, H.,  
559 Mollenkopf, H.J., Mangler, M., Sehouli, J., Fotopoulou, C., Meyer, T.F., 2015. The Notch and



- 560 Wnt pathways regulate stemness and differentiation in human fallopian tube organoids. *Nat*  
561 *Commun* 6, 8989.
- 562 Kim, J.M., Park, J.E., Yoo, I., Han, J., Kim, N., Lim, W.J., Cho, E.S., Choi, B., Choi, S., Kim,  
563 T.H., Te Pas, M.F.W., Ka, H., Lee, K.T., 2018. Integrated transcriptomes throughout swine  
564 oestrous cycle reveal dynamic changes in reproductive tissues interacting networks. *Sci Rep* 8,  
565 5436.
- 566 Koyama, H., Shi, D., Fujimori, T., 2019. Biophysics in oviduct: Planar cell polarity, cilia,  
567 epithelial fold and tube morphogenesis, egg dynamics. *Biophys Physicobiol* 16, 89-107.
- 568 Legendre, M., Zaragosi, L.E., Mitchison, H.M., 2020. Motile cilia and airway disease. *Semin*  
569 *Cell Dev Biol*.
- 570 Lewis, M., Stracker, T.H., 2020. Transcriptional regulation of multiciliated cell differentiation.  
571 *Semin Cell Dev Biol*.
- 572 Lohman, B.K., Weber, J.N., Bolnick, D.I., 2016. Evaluation of TagSeq, a reliable low-cost  
573 alternative for RNAseq. *Mol Ecol Resour* 16, 1315-1321.
- 574 Love, M.I., Huber, W., Anders, S., 2014. Moderated estimation of fold change and dispersion for  
575 RNA-seq data with DESeq2. *Genome Biol* 15, 550.
- 576 Maillo, V., de Frutos, C., O'Gaora, P., Forde, N., Burns, G.W., Spencer, T.E., Gutierrez-Adan,  
577 A., Lonergan, P., Rizos, D., 2016. Spatial differences in gene expression in the bovine oviduct.  
578 *Reproduction* 152, 37-46.
- 579 Matz, M., Tag-based RNAseq, pp. [https://github.com/z0on/tag-based\\_RNAseq](https://github.com/z0on/tag-based_RNAseq).
- 580 Meyer, E., Aglyamova, G.V., Matz, M.V., 2011. Profiling gene expression responses of coral  
581 larvae (*Acropora millepora*) to elevated temperature and settlement inducers using a novel RNA-  
582 Seq procedure. *Mol Ecol* 20, 3599-3616.
- 583 Novak, E., Everett, H., 1928. Cyclical and other variations in the tubal epithelium. *American*  
584 *Journal of Obstetrics and Gynecology* 16, 499-530.

- 585 Ossipova, O., Kim, K., Sokol, S.Y., 2015. Planar polarization of Vangl2 in the vertebrate neural  
586 plate is controlled by Wnt and Myosin II signaling. *Biol Open* 4, 722-730.
- 587 Patir, A., Fraser, A.M., Barnett, M.W., McTeir, L., Rainger, J., Davey, M.G., Freeman, T.C.,  
588 2020. The transcriptional signature associated with human motile cilia. *Scientific Reports* 10,  
589 10814.
- 590 Roberson, E.C., Tran, N.K., Konjikusic, M.J., Fitch, R.D., Gray, R.S., Wallingford, J.B., 2020. A  
591 comparative study of the turnover of multiciliated cells in the mouse trachea, oviduct, and brain.  
592 *Dev Dyn* 249, 898-905.
- 593 Rose, I.M., Bidarimath, M., Webster, A., Godwin, A.K., Flesken-Nikitin, A., Nikitin, A.Y.,  
594 2020. WNT and inflammatory signaling distinguish human Fallopian tube epithelial cell  
595 populations. *Sci Rep* 10, 9837.
- 596 Schmittgen, T.D., Livak, K.J., 2008. Analyzing real-time PCR data by the comparative C(T)  
597 method. *Nature protocols* 3, 1101-1108.
- 598 Shi, D., Komatsu, K., Hirao, M., Toyooka, Y., Koyama, H., Tissir, F., Goffinet, A.M., Uemura,  
599 T., Fujimori, T., 2014. *Celsr1* is required for the generation of polarity at multiple levels of the  
600 mouse oviduct. *Development (Cambridge, England)* 141, 4558-4568.
- 601 Shi, D., Komatsu, K., Uemura, T., Fujimori, T., 2011. Analysis of ciliary beat frequency and  
602 ovum transport ability in the mouse oviduct. *Genes Cells* 16, 282-290.
- 603 Shi, D., Usami, F., Komatsu, K., Oka, S., Abe, T., Uemura, T., Fujimori, T., 2016. Dynamics of  
604 planar cell polarity protein Vangl2 in the mouse oviduct epithelium. *Mech Dev* 141, 78-89.
- 605 Shirley, B., Reeder, R.L., 1996. Cyclic changes in the ampulla of the rat oviduct. *J Exp Zool* 276,  
606 164-173.
- 607 Sisu, C., Muir, P., Frankish, A., Fiddes, I., Diekhans, M., Thybert, D., Odom, D.T., Flicek, P.,  
608 Keane, T.M., Hubbard, T., Harrow, J., Gerstein, M., 2020. Transcriptional activity and strain-  
609 specific history of mouse pseudogenes. *Nat Commun* 11, 3695.

- 610 Sonesson, C., Love, M.I., Robinson, M.D., 2015. Differential analyses for RNA-seq: transcript-  
611 level estimates improve gene-level inferences. *F1000Res* 4, 1521.
- 612 Sowamber, R., Nelson, O., Dodds, L., DeCastro, V., Paudel, I., Milea, A., Considine, M., Cope,  
613 L., Pinto, A., Schlumbrecht, M., Slomovitz, B., Shaw, P.A., George, S.H.L., 2020. Integrative  
614 Transcriptome Analyses of the Human Fallopian Tube: Fimbria and Ampulla-Site of Origin of  
615 Serous Carcinoma of the Ovary. *Cancers (Basel)* 12.
- 616 Stewart, C.A., Behringer, R.R., 2012. Mouse oviduct development. *Results Probl Cell Differ* 55,  
617 247-262.
- 618 Suarez, S.S., 2016. Mammalian sperm interactions with the female reproductive tract. *Cell*  
619 *Tissue Res* 363, 185-194.
- 620 Talbot, P., Geiske, C., Knoll, M., 1999. Oocyte pickup by the mammalian oviduct. *Mol Biol Cell*  
621 10, 5-8.
- 622 Verhage, H., Abel Jr, J., Tietz Jr, W., Barrau, M., 1973. Development and maintenance of the  
623 oviductal epithelium during the estrous cycle in the bitch. *Biology of reproduction* 9, 460-474.
- 624 Winuthayanon, W., Bernhardt, M.L., Padilla-Banks, E., Myers, P.H., Edin, M.L., Lih, F.B.,  
625 Hewitt, S.C., Korach, K.S., Williams, C.J., 2015. Oviductal estrogen receptor alpha signaling  
626 prevents protease-mediated embryo death. *Elife* 4, e10453.
- 627 Yamanouchi, H., Umezu, T., Tomooka, Y., 2010. Reconstruction of oviduct and demonstration  
628 of epithelial fate determination in mice. *Biology of reproduction* 82, 528-533.
- 629 Zeisel, A., Yitzhaky, A., Bossel Ben-Moshe, N., Domany, E., 2013. An accessible database for  
630 mouse and human whole transcriptome qPCR primers. *Bioinformatics* 29, 1355-1356.
- 631
- 632

Table S-1

| Gene            | Sequence                                                                  |
|-----------------|---------------------------------------------------------------------------|
| <i>Rpl23a</i>   | F: 5' - AGGCAGCCAAAATATCCTCG - 3'<br>R: 5' - TTCTTCATGGCTGACTCCGT - 3'    |
| <i>Rps9</i>     | F: 5' - GCTAGACGAGAAGGATCCCC - 3'<br>R: 5' - ATCCAGCTTCATCTTGCCCT - 3'    |
| <i>Rpl13</i>    | F: 5' - TACTGAAGCCCCACTTCCAC - 3'<br>R: 5' - CGGACCTTGGTGTGGTATCT - 3'    |
| <i>Rps20</i>    | F: 5' - GAACAAGTCGGTCAGGAAGC - 3'<br>R: 5' - CTCTGATCAAGTCCGCACAA - 3'    |
| <i>Mmp7</i>     | F: 5' - CCTAGGCGGAGATGCTCACT - 3'<br>R: 5' - GAGAGTGGCCAAAATTCATGG - 3'   |
| <i>Spock1</i>   | F: 5' - CTGAAGCCCAAAGCAGAGAA - 3'<br>R: 5' - CTCATGAAGAGCCCCGAAC - 3'     |
| <i>Gsta3</i>    | F: 5' - GATTTAGACTCCAAGCGGCA - 3'<br>R: 5' - TTCCCCTGCCATCAAAGTAA - 3'    |
| <i>Foxj1</i>    | F: 5' - TGTGGATCTTACAGTCCATGGC - 3'<br>R: 5' - TCTCATCAAAGTCCAGGCTGC - 3' |
| <i>Tmem231</i>  | F: 5' - AACAGAAGCAGCCACTGAGC - 3'<br>R: 5' - AACAAATGTGGGTGAGGTCGT - 3'   |
| <i>Ift140</i>   | F: 5' - ATTCTTGGCAGTCGCATCTA - 3'<br>R: 5' - GAAGTGGCCTGGAAAGACCT - 3'    |
| <i>Ift57</i>    | F: 5' - GCGGAATGGAGCCTAGAAGT - 3'<br>R: 5' - CTTTTGTGCTGGTGCATTTG - 3'    |
| <i>Dnah9</i>    | F: 5' - TGTGAACGCATGAACATCCT - 3'<br>R: 5' - TTCCATCTCACTGGTCATGGT - 3'   |
| <i>Msx2</i>     | F: 5' - AGCTGAAAATGGCTGCCAAG - 3'<br>R: 5' - TAGGATGCGCCGTATATGGATG - 3'  |
| <i>Wnt7a</i>    | F: 5' - GCCTGGACGAGTGTCAGTTT - 3'<br>R: 5' - AATCGCATAGGTGAAGGCAG - 3'    |
| <i>Wnt5a</i>    | F: 5' - CACGTTTTTCTCCTTCGCC - 3'<br>R: 5' - AGTTGGCTGCAGAGAGGCT - 3'      |
| <i>Slc39a8</i>  | F: 5' - GGCCAGCTGCACTTCAAC - 3'<br>R: 5' - GCAGATGGCAGAGAAGTTCG - 3'      |
| <i>Atp1b1</i>   | F: 5' - GAAGCCCTGCATCATTATCAA - 3'<br>R: 5' - GAACAGGCAGGACATTTGGA - 3'   |
| <i>Prickle1</i> | F: 5' - GTGGCTGCTTCGAGTCTCTC - 3'<br>R: 5' - TCGTAGGTCATCTGTGCGTG - 3'    |
| <i>Vangl2</i>   | F: 5' - TACTACGAGGAAGCCGAGCA - 3'<br>R: 5' - CTTCTGCAGCCGCTTAAT - 3'      |
| <i>Pax8</i>     | F: 5' - ACAGGGCAGCTATGCCTCTT - 3'<br>R: 5' - GCTGTAGGCATTGCCAGAAT - 3'    |
| <i>Hprt</i>     | F: 5' - CATAACCTGGTTCATCATCGC - 3'<br>R: 5' - TCCTCCTCAGACCGCTTTT - 3'    |
| <i>Dolk</i>     | F: 5' - CAGTGTGGGACCGATACTCCT - 3'<br>R: 5' - CCAAGCAAAGGCATGACCA - 3'    |
| <i>Sra1</i>     | F: 5' - ACGACCCGCCACAATTCTC - 3'<br>R: 5' - CTGGAAGCCTTACTTGAAGGAG - 3'   |

| Table S-2 |               |           |           |       |                 |             |           |           |         |                           |                                   |
|-----------|---------------|-----------|-----------|-------|-----------------|-------------|-----------|-----------|---------|---------------------------|-----------------------------------|
| ID        | Sample        | Location  | Stage     | Phase | Location Phase  | # Raw reads | # Deduped | # Aligned | % Align | GEO Fastq file            | GEO kallisto counts file          |
| S1        | Proes Ant B1  | Anterior  | Proestrus | Early | Anterior Early  | 2,669,590   | 1,392,774 | 1,038,851 | 74.6%   | Proes Ant B1 R1.fastq.gz  | Proes Ant B1 kallisto counts.tsv  |
| S2        | Proes Ant B2  | Anterior  | Proestrus | Early | Anterior Early  | 2,903,086   | 1,583,735 | 1,184,664 | 74.8%   | Proes Ant B2 R1.fastq.gz  | Proes Ant B2 kallisto counts.tsv  |
| S3        | Proes Post B1 | Posterior | Proestrus | Early | Posterior Early | 3,820,771   | 1,809,899 | 1,358,747 | 75.1%   | Proes Post B1 R1.fastq.gz | Proes Post B1 kallisto counts.tsv |
| S4        | Proes Post B2 | Posterior | Proestrus | Early | Posterior Early | 2,542,319   | 1,258,262 | 936,809   | 74.5%   | Proes Post B2 R1.fastq.gz | Proes Post B2 kallisto counts.tsv |
| S5        | Es Ant B1     | Anterior  | Estrus    | Early | Anterior Early  | 3,859,515   | 2,015,223 | 1,524,157 | 75.6%   | Es Ant B1 R1.fastq.gz     | Es Ant B1 kallisto counts.tsv     |
| S6        | Es Ant B2     | Anterior  | Estrus    | Early | Anterior Early  | 4,976,661   | 2,393,539 | 1,803,496 | 75.3%   | Es Ant B2 R1.fastq.gz     | Es Ant B2 kallisto counts.tsv     |
| S7        | Es Post B1    | Posterior | Estrus    | Early | Posterior Early | 3,051,253   | 1,508,916 | 1,166,422 | 77.3%   | Es Post B1 R1.fastq.gz    | Es Post B1 kallisto counts.tsv    |
| S8        | Es Post B2    | Posterior | Estrus    | Early | Posterior Early | 1,486,318   | 792,559   | 589,353   | 74.4%   | Es Post B2 R1.fastq.gz    | Es Post B2 kallisto counts.tsv    |
| S9        | Metes Ant B1  | Anterior  | Metestrus | Late  | Anterior Late   | 1,509,395   | 896,284   | 696,932   | 77.8%   | Metes Ant B1 R1.fastq.gz  | Metes Ant B1 kallisto counts.tsv  |
| S10       | Metes Ant B2  | Anterior  | Metestrus | Late  | Anterior Late   | 1,742,088   | 1,000,503 | 771,609   | 77.1%   | Metes Ant B2 R1.fastq.gz  | Metes Ant B2 kallisto counts.tsv  |
| S11       | Metes Post B1 | Posterior | Metestrus | Late  | Posterior Late  | 3,034,943   | 1,266,394 | 989,728   | 78.2%   | Metes Post B1 R1.fastq.gz | Metes Post B1 kallisto counts.tsv |
| S12       | Metes Post B2 | Posterior | Metestrus | Late  | Posterior Late  | 4,033,746   | 1,918,652 | 1,484,995 | 77.4%   | Metes Post B2 R1.fastq.gz | Metes Post B2 kallisto counts.tsv |
| S13       | Dies Ant B1   | Anterior  | Diestrus  | Late  | Anterior Late   | 4,403,124   | 2,067,053 | 1,605,618 | 77.7%   | Dies Ant B1 R1.fastq.gz   | Dies Ant B1 kallisto counts.tsv   |
| S14       | Dies Ant B2   | Anterior  | Diestrus  | Late  | Anterior Late   | 4,161,010   | 1,439,043 | 1,088,609 | 75.6%   | Dies Ant B2 R1.fastq.gz   | Dies Ant B2 kallisto counts.tsv   |
| S15       | Dies Post B1  | Posterior | Diestrus  | Late  | Posterior Late  | 2,131,914   | 946,725   | 726,724   | 76.8%   | Dies Post B1 R1.fastq.gz  | Dies Post B1 kallisto counts.tsv  |
| S16       | Dies Post B2  | Posterior | Diestrus  | Late  | Posterior Late  | 1,522,405   | 721,007   | 572,923   | 79.5%   | Dies Post B2 R1.fastq.gz  | Dies Post B2 kallisto counts.tsv  |
